# Supplementary material for: Unique sandwich structure of Ru@TiO2: salicylic acid micro-etching from K2Ti2O5 and high-performance electrocatalytic hydrogen evolution
Source: Royal Society of Chemistry journal article supplement (doi:10.1039/d3qi00615h), 2023-01-01
Supplement: d3qi00615h1.pdf [file d3qi00615h1.pdf]

Supporting Information

**Unique Sandwich Structure of Ru@TiO<sub>2</sub>: Salicylic Acid Microetching from K<sub>2</sub>Ti<sub>2</sub>O<sub>5</sub> and High-Performance Electrocatalytic Hydrogen Evolution**

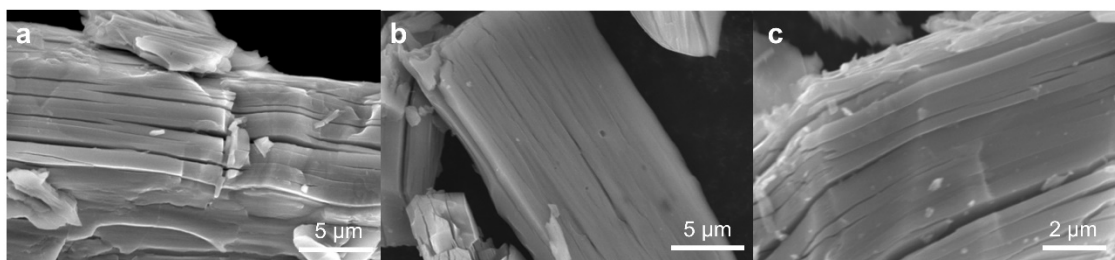

**Figure S1.** SEM image of (a) K<sub>2</sub>Ti<sub>2</sub>O<sub>5</sub>, (b) H<sub>x</sub>[Ti<sub>2</sub>O<sub>5</sub>] and (c) Ru<sub>x</sub>[Ti<sub>2</sub>O<sub>5</sub>].

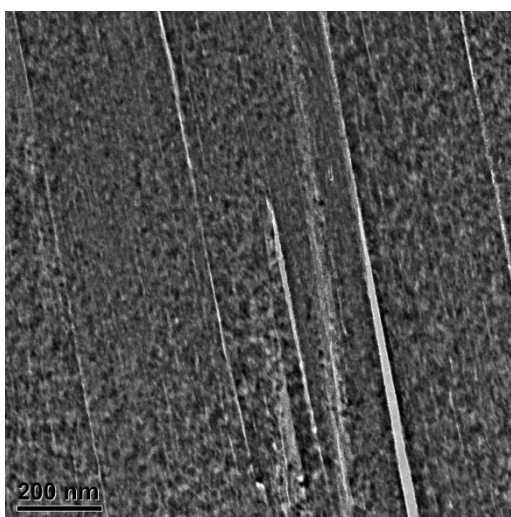

**Figure S2.** TEM image of the longitudinal section of Ru@TiO<sub>2</sub> sandwich.

**Figure S3.** (a) TEM image of Ru@TiO<sub>2</sub> sandwich. (b) Corresponding particle size distribution of Ru nanoparticle.

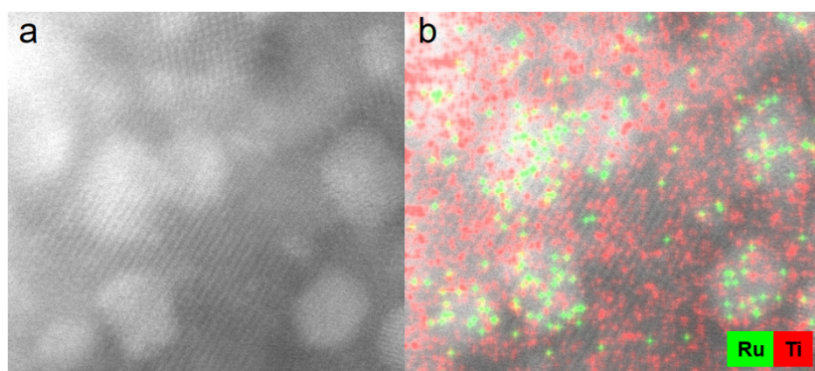

**Figure S4.** HAADF and corresponding elemental mapping of Ru@TiO<sub>2</sub> sandwich.

**Figure S5.** SAED image of Ru@TiO<sub>2</sub> sandwich.

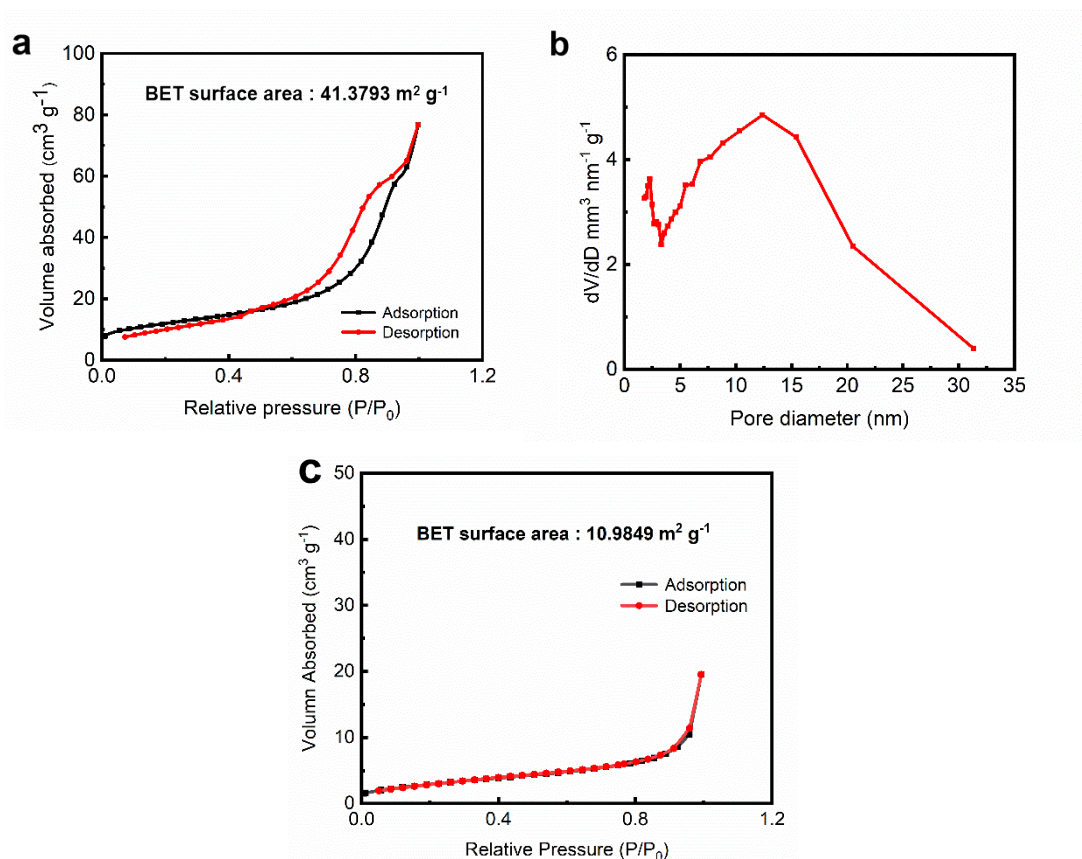

**Figure S6.** (a) Nitrogen adsorption-desorption isotherms and (b) BJH pore-diameter distribution of Ru@TiO<sub>2</sub> sandwich. (c) Nitrogen adsorption-desorption isotherms of commercial anatase nano TiO<sub>2</sub>.

**Figure S7.** LSV curves for 2.54 wt. % Ru@TiO<sub>2</sub> sandwiches annealed at different temperatures.

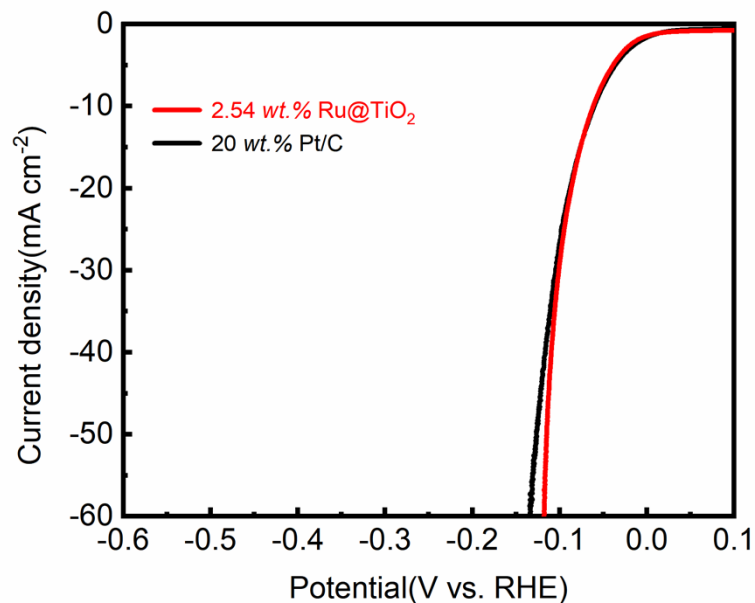

**Figure S8.** LSV curves for 2.54 wt. % Ru@TiO<sub>2</sub> sandwich and 20 wt. % Pt/C at high current density.

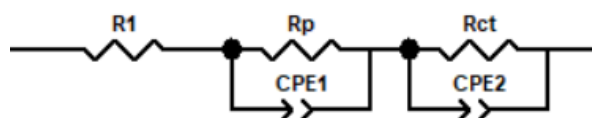

**Figure S9.** Equivalent circuit used for approximation of the EIS data: Two-CPE model. R1, Rp, Rct, CPE1, and CPE2 represent the solution resistance, electrode texture and charge transfer resistances, and constant phase elements, respectively.

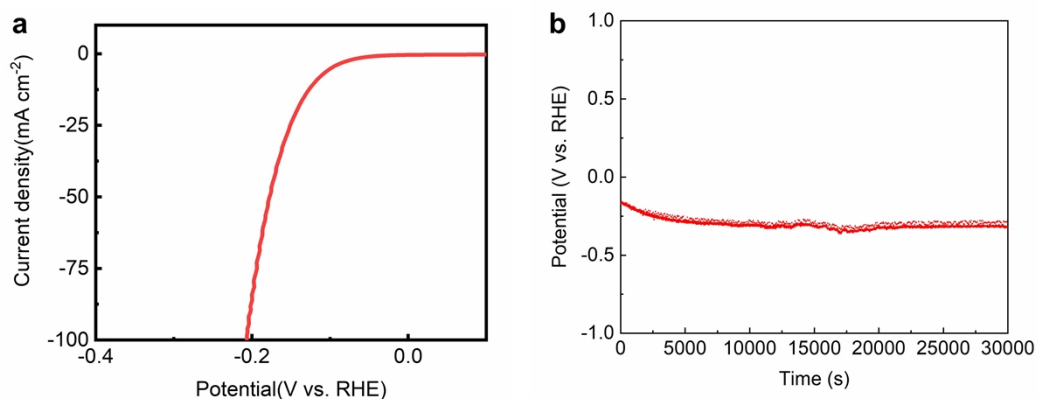

**Figure S10.** (a) LSV curve of 2.54 wt.% Ru@TiO<sub>2</sub> sandwich in 0.5 M H<sub>2</sub>SO<sub>4</sub>. (b) CP curve of 2.54 wt.% Ru@TiO<sub>2</sub> at 100 mA cm<sup>-3</sup> in 0.5 M H<sub>2</sub>SO<sub>4</sub>.

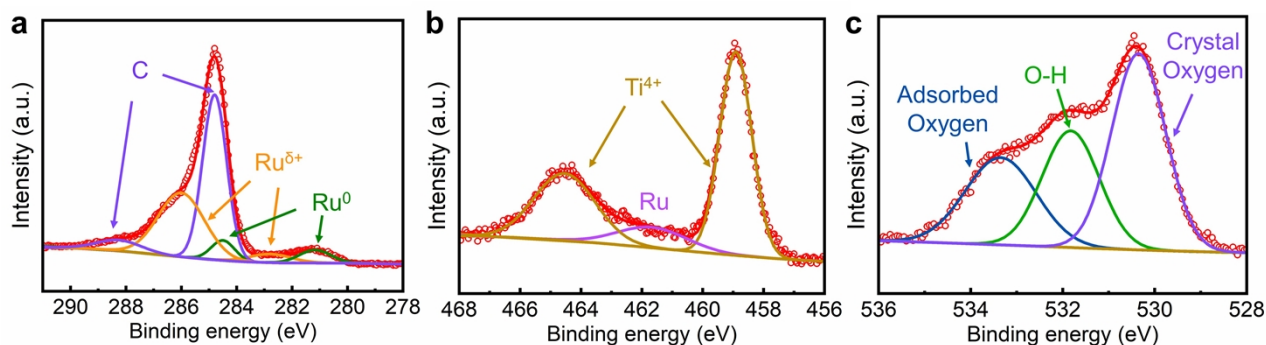

**Figure S11.** (a) Ru 3d, (b) Ru 2p and (c) O 1s XPS curves of Ru@TiO<sub>2</sub> sandwich after cycling at 10 mA cm<sup>-3</sup> for 12 h.

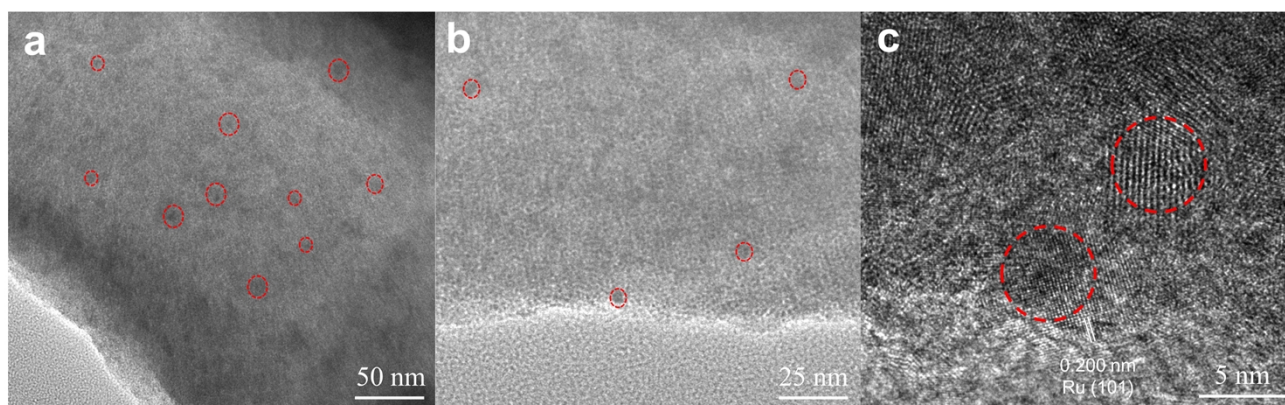

**Figure S12.** (a, b) TEM and (c) HRTEM images of Ru@TiO<sub>2</sub> sandwich after cycling at 10 mA cm<sup>-3</sup> for 12 h.

**Table S1.** EDX analysis of K<sub>2</sub>Ti<sub>2</sub>O<sub>5</sub> and H<sub>x</sub>[Ti<sub>2</sub>O<sub>5</sub>].

| Sample                                           | K (at. %) | Ti (at. %) | O (at. %) |
|--------------------------------------------------|-----------|------------|-----------|
| K <sub>2</sub> Ti <sub>2</sub> O <sub>5</sub>    | 13.4      | 20.4       | 66.2      |
| H <sub>x</sub> [Ti <sub>2</sub> O <sub>5</sub> ] | 0.9       | 25.4       | 73.5      |

**Table S2.** HER performance comparison between Ru@TiO<sub>2</sub> and other electrocatalysts

| Catalyst            | Electrolyte | Ru content<br>(wt. %) | η (mV) at 10<br>(mA cm <sup>-2</sup> ) | Tafel slope<br>(mV dec <sup>-1</sup> ) | References |
|---------------------|-------------|-----------------------|----------------------------------------|----------------------------------------|------------|
| Ru@TiO <sub>2</sub> | 0.1 M KOH   | 2.54                  | 60                                     | 70                                     | This work  |

|                                       |           |       |    |      |   |
|---------------------------------------|-----------|-------|----|------|---|
| <b>Ru-C/TiO<sub>2</sub></b>           | 1 M KOH   | 23.1  | 44 | 73.7 | 1 |
| <b>Cu<sub>2-x</sub>S@Ru</b>           | 1 M KOH   | 63.8  | 82 | 48   | 2 |
| <b>Ru@CN</b>                          | 1 M KOH   | 3.18  | 32 | 64   | 3 |
| <b>Ni<sub>5</sub>P<sub>4</sub>-Ru</b> | 1 M KOH   | 3.83% | 54 | 52   | 4 |
| <b>Ru-CoP/NC</b>                      | 1 M KOH   | 10    | 22 | 50   | 5 |
| <b>Ru-OCNT</b>                        | 1 M KOH   | 20    | 34 | 27.8 | 6 |
| <b>Ru/NC@WOC</b>                      | 0.1 M KOH | 6.3   | 32 | 40.5 | 7 |

## References

1. Wang, Y. J.; Zhu, Q. X.; Xie, T. P.; Peng, Y.; Liu, S. L.; Wang, J. K., Promoted Alkaline Hydrogen Evolution Reaction Performance of Ru/C by Introducing TiO<sub>2</sub> Nanoparticles. *Chemelectrochem* **2020**, *7* (5), 1182-1186.
2. Yoon, D.; Lee, J.; Seo, B.; Kim, B.; Baik, H.; Joo, S. H.; Lee, K. Cactus-Like Hollow Cu<sub>2-x</sub>S@Ru Nanoplates as Excellent and Robust Electrocatalysts for the Alkaline Hydrogen Evolution Reaction. *Small* **2017**, *13*.
3. Wang, J.; Wei, Z.; Mao, S.; Li, H.; Wang, Y. Highly Uniform Ru Nanoparticles over N-Doped Carbon: Ph and Temperature-Universal Hydrogen Release from Water Reduction. *Energy Environ. Sci.* **2018**, *11*, 800-806.
4. He, Q.; Tian, D.; Jiang, H. L.; Cao, D. F.; Wei, S. Q.; Liu, D. B.; Song, P.; Lin, Y.; Song, L., Achieving Efficient Alkaline Hydrogen Evolution Reaction over a Ni<sub>5</sub>P<sub>4</sub> Catalyst Incorporating Single-Atomic Ru Sites. *Adv Mater* **2020**, *32* (11).
5. Hao, Y. R.; Xue, H.; Sun, J.; Guo, N. K.; Song, T. S.; Sun, J. W.; Wang, Q., Tuning the Electronic Structure of CoP Embedded in N-Doped Porous Carbon Nanocubes Via Ru Doping for Efficient

Hydrogen Evolution. *ACS applied materials & interfaces* **2021**, *13* (47), 56035-56044.

6. Ding, R. F.; Lin, L. J.; Pei, C. G.; Yu, X.; Sun, Q. J.; Park, H. S., Hierarchical Architectures Based on Ru Nanoparticles/Oxygen-Rich-Carbon Nanotubes for Efficient Hydrogen Evolution. *Chem-Eur J* **2021**, *27* (43), 11150-11157.
7. Yang, Y. T.; Shao, X.; Zhou, S. Q.; Yan, P. X.; Isimjan, T. T.; Yang, X. L., Interfacial Electronic Coupling of NC@WO<sub>3</sub>-W<sub>2</sub>C Decorated Ru Clusters as a Reversible Catalyst toward Electrocatalytic Hydrogen Oxidation and Evolution Reactions. *Chemsuschem* **2021**, *14* (14), 2992-3000.
